# Supplementary material for: RETRACTED ARTICLE: pNaKtide Attenuates Steatohepatitis and Atherosclerosis by Blocking Na/K-ATPase/ROS Amplification in C57Bl6 and ApoE Knockout Mice Fed a Western Diet
Source: PubMed Central journal article supplement (PMC5428305; doi:10.1038/s41598-017-00306-5), 2017-03-15
Supplement: 41598_2017_306_MOESM1_ESM.pdf [file 41598_2017_306_MOESM1_ESM.pdf]

**Title: pNaKtide Attenuates Steatohepatitis and Atherosclerosis by Blocking Na/K-ATPase/ROS Amplification in C57Bl6 and ApoE Knockout Mice Fed a Western Diet**

**Authors:** Komal Sodhi<sup>1</sup>, Krithika Srikanthan<sup>1</sup>, Perrine Goguet-Rubio<sup>1</sup>, Alexandra Nichols<sup>1</sup>, Amrita Mallick<sup>1</sup>, Athar Nawab<sup>1</sup>, Rebecca Martin<sup>1</sup>, Preeya T. Shah<sup>1</sup>, Muhammad Chaudhry<sup>1</sup>, Saroj Sigdel<sup>1</sup>, Mehیار El-Hamdani<sup>1</sup>, Jiang Liu<sup>1</sup>, Zijian Xie<sup>1</sup>, Nader G. Abraham<sup>1,2</sup>, and Joseph I. Shapiro<sup>1\*</sup>

**Affiliations:**

<sup>1</sup>Departments of Medicine, Surgery, Pathology, and Cardiology, Joan C. Edwards School of Medicine, Marshall University.

<sup>2</sup>Department of Medicine, New York Medical College, Valhalla, NY, USA 10595.

**\*Correspondence:**

Joseph I. Shapiro, M.D.

Dean, Joan C. Edwards School of Medicine

Professor of Medicine

Marshall University

1600 Medical Center Drive

Suite 3408

Huntington, WV 25701-3655

Email: [shapiroj@marshall.edu](mailto:shapiroj@marshall.edu)

**Supplementary Figure 1: pNaKtide distribution in hepatic and aortic tissue.**

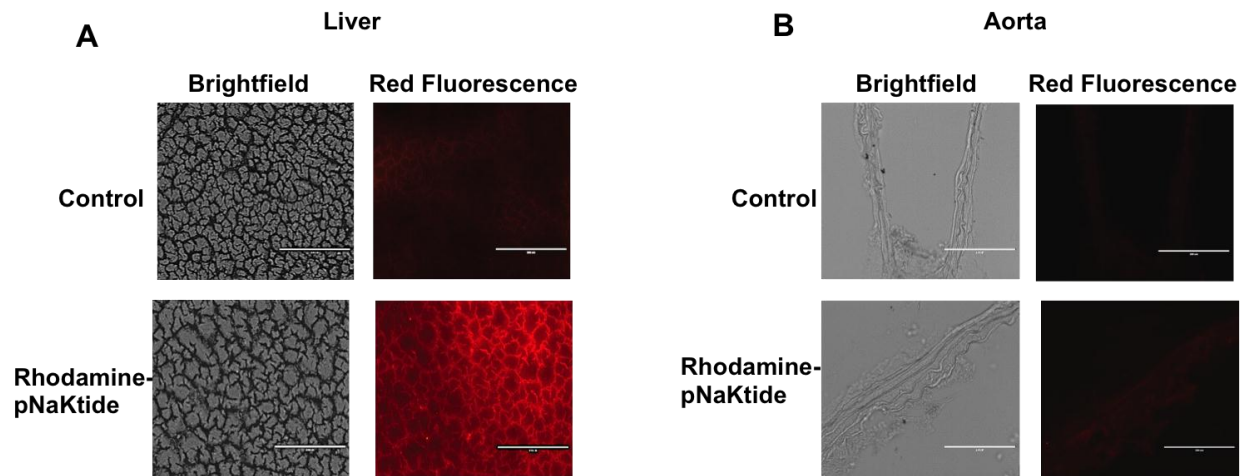

**Supplementary Fig. 1: pNaKtide distribution in hepatic and aortic tissue.** To study whether pNaKtide was distributed in the liver (**A**) and aorta (**B**), rhodamine-labeled pNaKtide or 1xPBS (for control) was injected intraperitoneally in mice. The rhodamine-labeled pNaKtide was efficiently distributed in the liver, power 5% (**A**), but not aortic plaques, power 5% (**B**) 3 hours after administration ( $n=4$ ).

**Supplementary Figure 2: Effect of pNaKtide on body weight, glucose tolerance, and lipid profile in control C57Bl6 mice.**

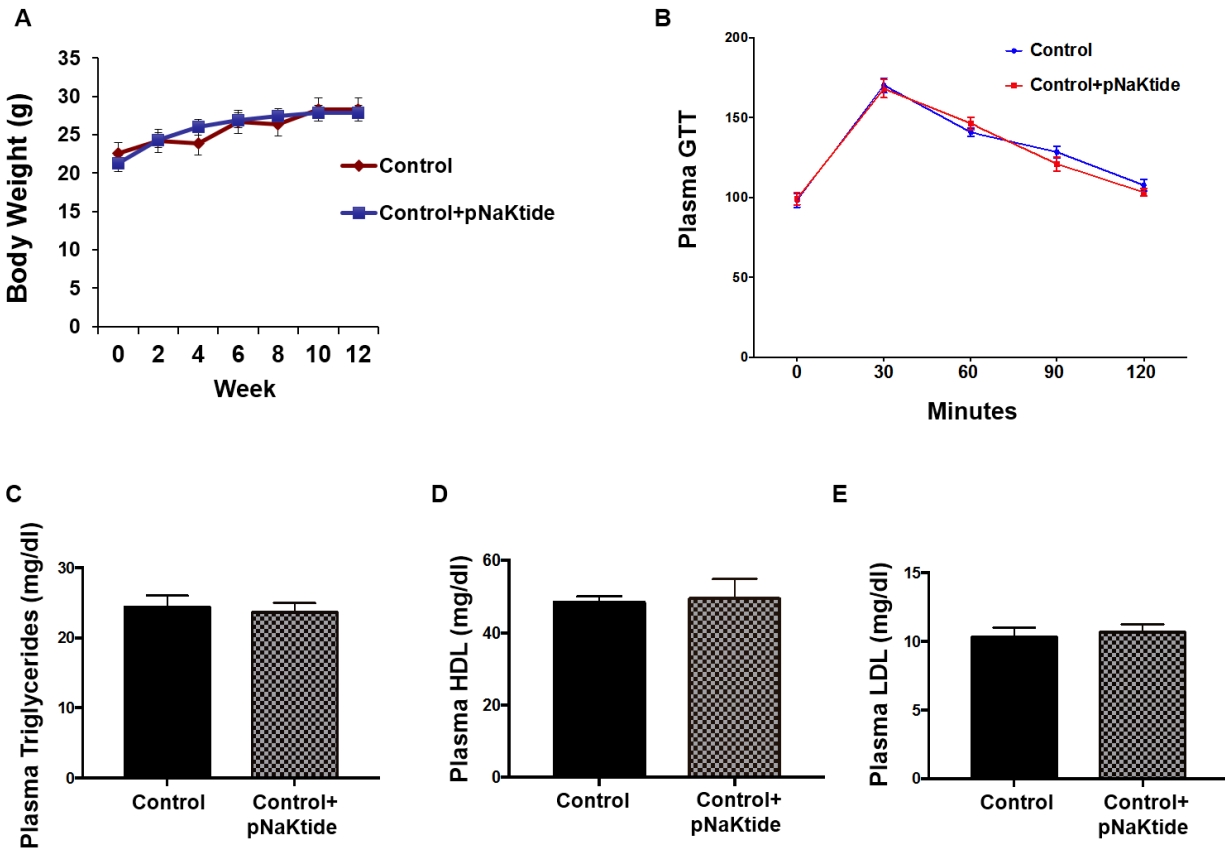

**Supplementary Fig. 2: Effect of pNaKtide on body weight, glucose tolerance, and lipid profile in control C57Bl6 mice.** C57Bl6 mice were injected with 25mg/kg body weight of pNaKtide every 7 days while on a standard chow diet for 8 weeks. pNaKtide treatment did not significantly change body weight (A), glucose tolerance (B), serum triglyceride (C), serum HDL (D), or serum LDL (E) when compared to the control group. Results are expressed as means  $\pm$  SEM,  $n=8-10$ /group.

**Supplementary Figure 3: Effect of pNaKtide on hepatic fibrosis in C57Bl6 & ApoE<sup>-/-</sup> mice fed a western diet.**

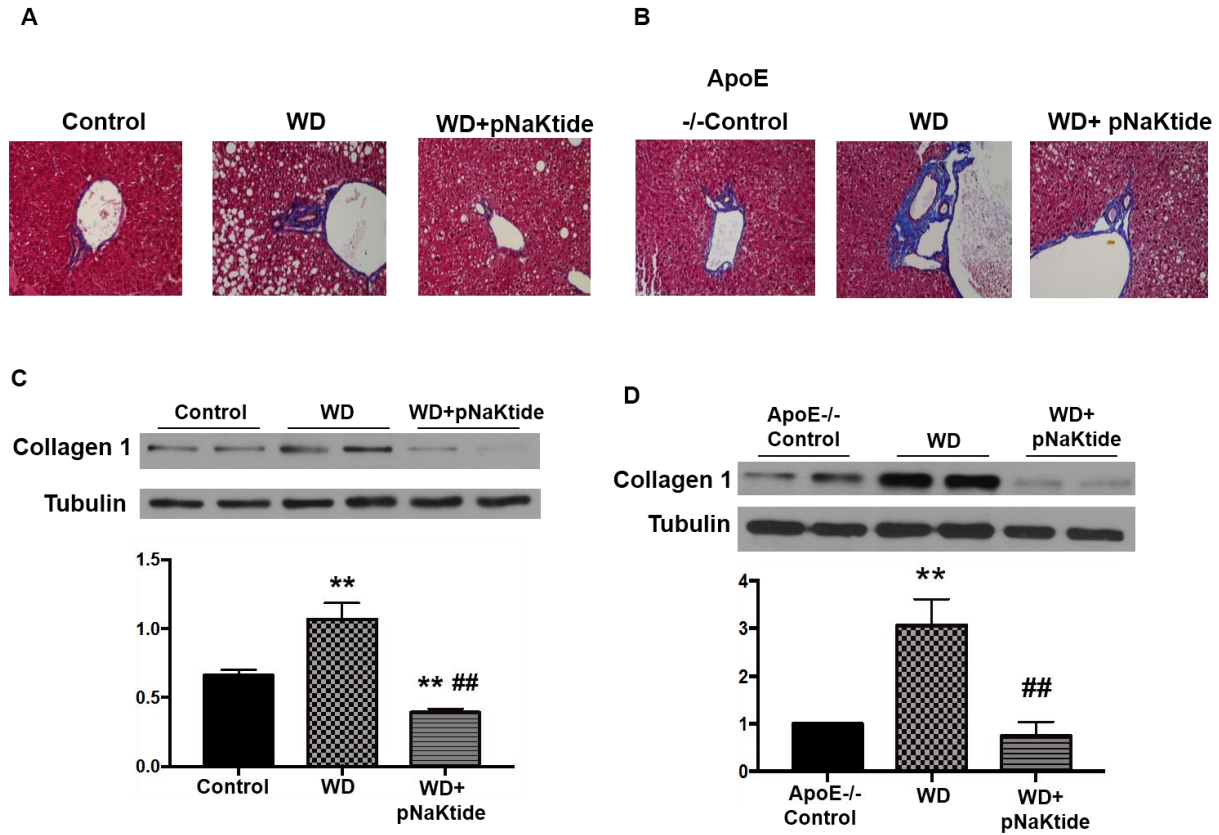

**Supplementary Fig. 3: Effect of pNaKtide on hepatic fibrosis in C57Bl6 & ApoE<sup>-/-</sup> mice fed a western diet.** Masson's trichrome staining of liver in C57Bl6(A) and ApoE<sup>-/-</sup>(B) and collagen-1 western blot analysis of liver homogenates with data shown as mean band density normalized to tubulin in C57Bl6 (C) and ApoE<sup>-/-</sup> mice(D). Results are means  $\pm$  SEM, n=6/group, \*p< 0.05 vs control, # p< 0.05 vs WD, \*\*p<0.01 vs control, ## p<0.01 vs WD.

**Supplementary Figure 4: Effect of pNaKtide on aortic lipid accumulation in C57Bl6 mice fed a western diet.**

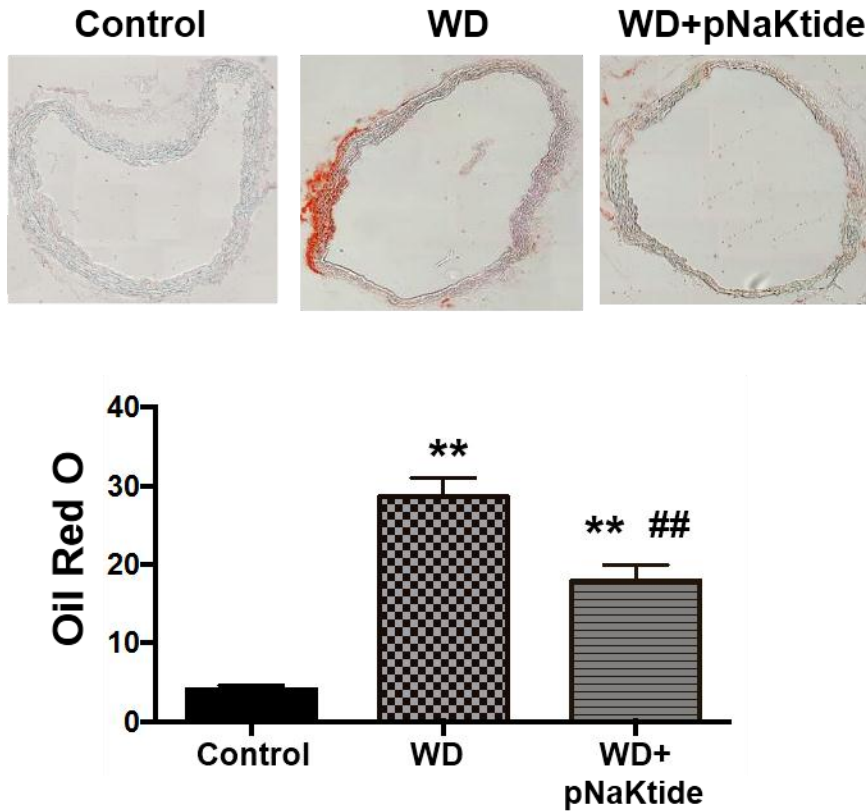

**Supplementary Fig. 4: Effect of pNaKtide on aortic lipid accumulation in C57Bl6 mice fed a western diet.** Aortic Oil Red O staining for lipid accumulation. Results are means  $\pm$  SEM,  $n=8-10$ /group, \* $p < 0.05$  vs control, # vs. WD.
